# Supplementary material
Source: PubMed Central journal article supplement (PMC9588733)

## SUPPLEMENTAL MATERIALS

**Supplemental Table I: ECG Intervals**

|                   | <b>(R)-Propafenone</b> |                     |                 | <b>(S)-Propafenone</b> |                    |                 | <b>Placebo</b>     |                    |                 |
|-------------------|------------------------|---------------------|-----------------|------------------------|--------------------|-----------------|--------------------|--------------------|-----------------|
|                   | <b>Pre</b>             | <b>Post</b>         | <b>P-value*</b> | <b>Pre</b>             | <b>Post</b>        | <b>P-value*</b> | <b>Pre</b>         | <b>Post</b>        | <b>P-value*</b> |
| RR interval (ms)  | 888<br>[746, 998]      | 1016<br>[851, 1095] | <0.001          | 863<br>[759, 970]      | 994<br>[860, 1094] | <0.001          | 839<br>[720, 1019] | 980<br>[753, 1134] | 0.001           |
| PR interval (ms)  | 156<br>[141, 175]      | 163<br>[148, 183]   | <0.001          | 159<br>[143, 180]      | 165<br>[151, 187]  | 0.002           | 141<br>[128, 163]  | 141<br>[129, 175]  | 0.344           |
| QRS duration (ms) | 96<br>[82, 106]        | 99<br>[89, 108]     | <0.001          | 88<br>[78, 100]        | 96<br>[84, 108]    | <0.001          | 90<br>[80, 105]    | 95<br>[86, 103]    | 0.048           |
| QTc (ms)          | 421<br>[407, 454]      | 432<br>[408, 461]   | 0.154           | 430<br>[410, 454]      | 439<br>[413, 458]  | 0.012           | 425<br>[390, 448]  | 428<br>[402, 456]  | 0.920           |

\*Paired comparison; Wilcoxon signed-rank tests of 20-min medians to Pre-drug medians

**Supplemental Table II: Change in ECG Intervals (Pre/Post Study Drug)**

|                     | <b>(R)-Propafenone</b> | <b>(S)-Propafenone</b> | <b>P-value<br/>(R) vs (S)*</b> | <b>Placebo</b> | <b>P-value<br/>(R) vs (S) vs Placebo†</b> |
|---------------------|------------------------|------------------------|--------------------------------|----------------|-------------------------------------------|
| Δ RR interval (ms)  | 107 [36, 202]          | 118 [18, 195]          | 0.998                          | 102 [1, 221]   | 0.999                                     |
| Δ PR interval (ms)  | 6 [-4, 17]             | 6 [-5, 17]             | 0.776                          | 7 [-6, 10]     | 0.519                                     |
| Δ QRS duration (ms) | 5 [-3, 11]             | 5 [-1, 14]             | 0.400                          | 3 [0, 12]      | 0.664                                     |
| Δ QTc (ms)          | 2 [-10, 31]            | 10 [-12, 27]           | 0.998                          | -4 [-20, 26]   | 0.776                                     |

\*Mann-Whitney U tests of differences in change between R and S-Propafenone.

†Kruskal-Wallis H test for three group variation.

**Supplemental Table III: Measures of AV Nodal and Atrial Conduction and Refractoriness**

|                            | <b>(R)-Propafenone (71)</b> | <b>(S)-Propafenone (75)</b> | <b>Placebo (19)</b> | <b>P-value*</b> |
|----------------------------|-----------------------------|-----------------------------|---------------------|-----------------|
| AV Block Cycle Length (ms) | 410 (70)                    | 400 (75)                    | 370 (18)            | 0.198           |
| AV Node ERP @ 600 (ms)     | 310 (60)                    | 295 (64)                    | 290 (17)            | 0.878           |
| AV Node ERP @ 450 (ms)     | 290 (54)                    | 300 (60)                    | 300 (17)            | 0.932           |
| Atrial ERP @ 600 (ms)      | 240 (69)                    | 240 (68)                    | 250 (19)            | 0.990           |
| Atrial ERP @ 450 (ms)      | 230 (63)                    | 230 (68)                    | 230 (18)            | 0.948           |

(Number of participants in parentheses). \*P-value calculated using Kruskal-Wallis H test.

**Supplemental Table IV: Arrhythmia Inducibility Endpoints**

|                                     | <b>Overall<br/>(N=165)</b> | <b>(R)-<br/>Propafenone<br/>(N=71)</b> | <b>(S)-<br/>Propafenone<br/>(N=75)</b> | <b>P-value<br/>(R) v. (S)*</b> | <b>Placebo<br/>(N=19)</b> | <b>P-value<br/>(R) v. (S) v.<br/>Placebo*</b> |
|-------------------------------------|----------------------------|----------------------------------------|----------------------------------------|--------------------------------|---------------------------|-----------------------------------------------|
| Sustained AF and/or AFL induced     | 132 (80.0%)                | 60 (84.5%)                             | 60 (80.0%)                             | 0.522                          | 12 (63.2%)                | 0.118                                         |
| Non-sustained AF and/or AFL induced | 22 (29.3%)                 | 18 (25.4%)                             | 22 (29.3%)                             | 0.711                          | 5 (26.3%)                 | 0.910                                         |
| Stage induced (AF and/or AFL)       |                            |                                        |                                        | 0.876                          |                           | 0.129                                         |
| S1/S2                               | 11 (6.7%)                  | 5 (7.0%)                               | 5 (6.7%)                               |                                | 1 (5.3%)                  |                                               |
| 15-beat burst                       | 62 (37.6%)                 | 28 (39.4%)                             | 31 (41.3%)                             |                                | 3 (15.8%)                 |                                               |
| 15-second burst                     | 59 (35.8%)                 | 27 (38.0%)                             | 24 (32.0%)                             |                                | 8 (42.1%)                 |                                               |
| No AF and/or AFL induced            | 33 (20.0%)                 | 11 (15.5%)                             | 15 (20.0%)                             |                                | 7 (36.8%)                 |                                               |
| Spontaneous termination of AF/AFL   | 70 (42.4%)                 | 31 (43.7%)                             | 30 (40.0%)                             | 0.738                          | 9 (47.4%)                 | 0.813                                         |
| Sustained AF-only induced (N=115)   | 82 (71.3%)                 | 37 (77.1%)                             | 34 (69.4%)                             | 0.493                          | 11 (61.1%)                | 0.384                                         |
| Stage induced (AF-only)             |                            |                                        |                                        | 0.979                          |                           | 0.403                                         |
| S1/S2                               | 9 (7.8%)                   | 4 (8.3%)                               | 4 (8.2%)                               |                                | 1 (5.6%)                  |                                               |
| 15-beat burst                       | 27 (23.5%)                 | 10 (20.8%)                             | 14 (28.6%)                             |                                | 3 (16.7%)                 |                                               |
| 15-second burst                     | 46 (40.0%)                 | 23 (47.9%)                             | 16 (32.6%)                             |                                | 7 (38.9%)                 |                                               |
| No AF induced                       | 33 (28.7%)                 | 11 (22.9%)                             | 15 (30.6%)                             |                                | 7 (38.9%)                 |                                               |
| Sustained AFL-only induced          | 50 (30.3%)                 | 23 (32.4%)                             | 26 (34.7%)                             | 0.861                          | 1 (5.3%)                  | 0.029                                         |

\*P-values calculated using Fisher's exact test or Chi-square for trend.

**Supplemental Figure I:** Concentration of (*R*) and (*S*)-propafenone According to Treatment Assignment

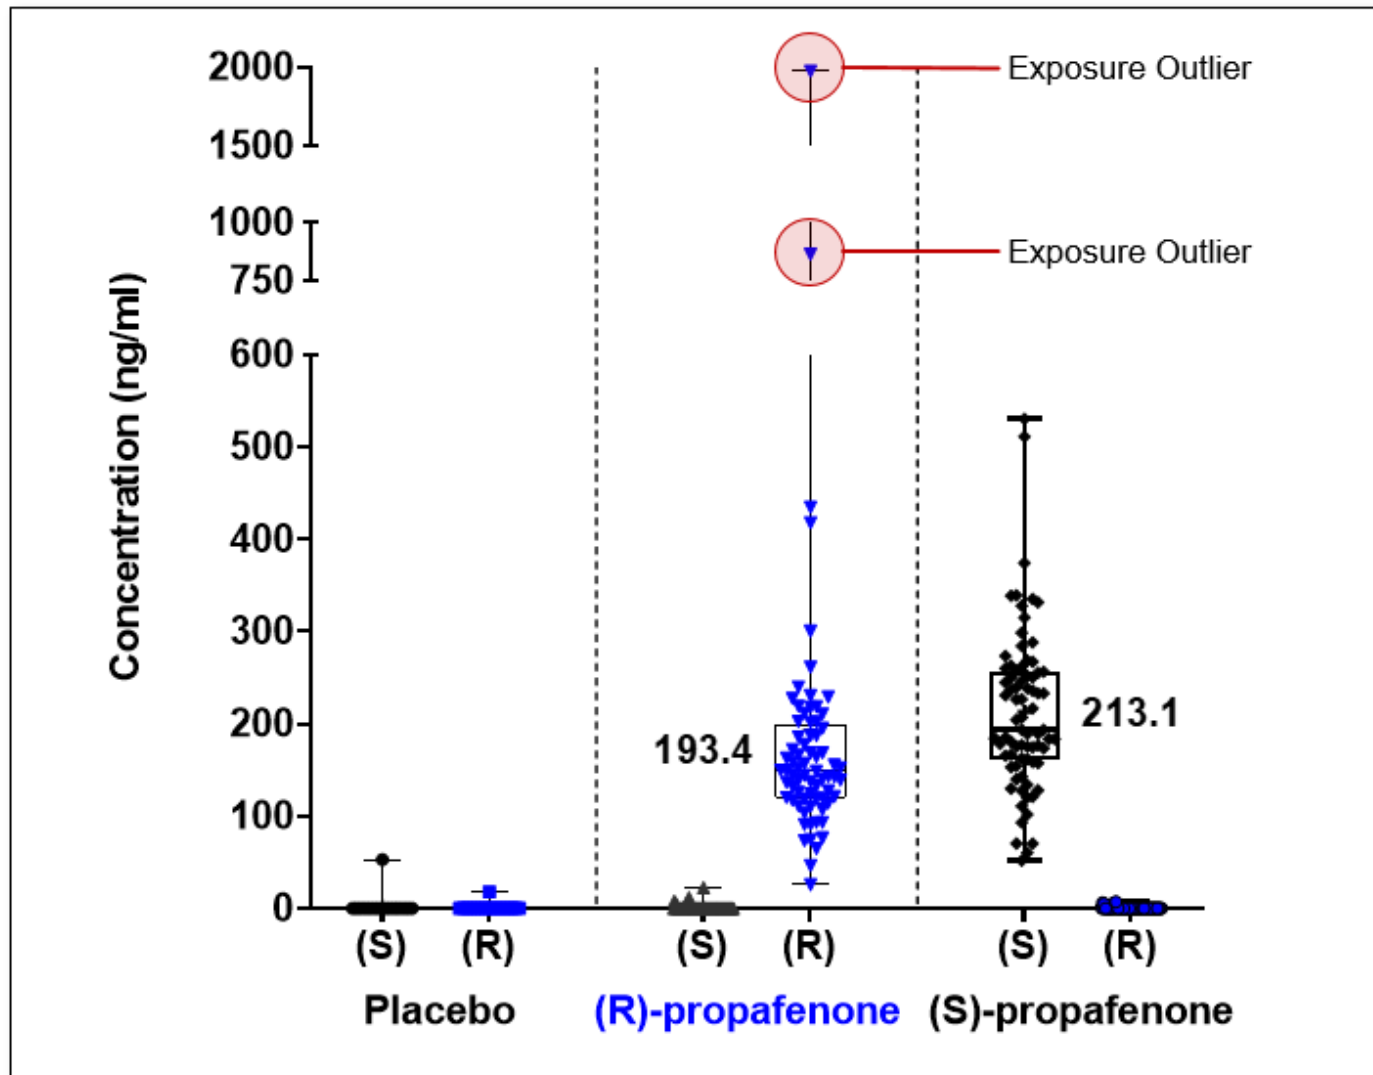

Supplement: NIHMS1836000-supplement-010713_-_Supplemental_Material.pdf [file NIHMS1836000-supplement-010713_-_Supplemental_Material.pdf]
